1 **CRISPR/Cas12a-mediated ultrasensitive and on-site monkeypox**  
2 **viral testing**

3 Furong Zhao<sup>a, 1</sup>, Pei Wang<sup>a, b, 1</sup>, Haoxuan Wang<sup>a, 1</sup>, Sirui Liu<sup>a</sup>, Muhammad Sohail<sup>a</sup>,  
4 Xing Zhang<sup>a</sup>, Bingzhi Li<sup>a, \*</sup>, He Huang<sup>a, \*</sup>

5 <sup>a</sup> School of Food Science and Pharmaceutical Engineering, Nanjing Normal  
6 University

7 <sup>b</sup> School of Life Sciences, Nanjing Normal University, Nanjing 210023, China

8 <sup>1</sup> Equal contributions:

9 F.Z, P.W, and H.W. contributed equally to this work.

10 \* Corresponding Author:

11 Bingzhi Li (bingzhili@njnu.edu.cn)

12 He Huang (huangh@njnu.edu.cn)

13

14 **Abstract**

15 The unexpected transmission of monkeypox virus (MPXV) from Central and  
16 West Africa to previously non-endemic locations is triggering a global panic. The  
17 ultrasensitive, rapid, and specific detection of MPXV is crucial for controlling its  
18 spreading, while such technology has rarely been reported. Herein, we proposed an  
19 MPXV assay combining recombinase-aided amplification (RAA) and  
20 CRISPR/Cas12a for the first time. This assay targeted MPXV *F3L* gene and yielded a  
21 low detection limit (LOD) of  $10^1$  copies/ $\mu$ L. Deriving from the high specificity nature  
22 of RAA and CRISPR/Cas12a, through rational optimizations of probes and conditions,  
23 this assay showed high selectivity that could distinguish MPXV from other orthopox  
24 viruses and current high-profile viruses. To facilitate on-site screening of potential  
25 MPXV carriers, a kit integrating lateral flow strips was developed, enabling  
26 naked-eye MPXV detection with a LOD of  $10^4$  copies/ $\mu$ L. Our RAA-Cas12a-MPXV  
27 assay was able to detect MPXV without the need for sophisticated operation and  
28 expensive equipment. We envision that this RAA-Cas12a-MPXV assay can be  
29 deployed in emerging viral outbreaks for on-site surveillance of MPXV.

30 **Keywords:** CRISPR; Cas12a; Monkeypox; Nucleic acid testing; Point-of-care testing

31

## 32 **Introduction**

33 As a member of the genus orthopoxvirus (OPXV) in the family *Poxviridae*,  
34 monkeypox virus (MPXV) is a double-stranded DNA (dsDNA) virus firstly isolated  
35 in 1958.<sup>1-3</sup> Monkeypox was not recognized as a zoonotic disease until the first human  
36 case discovered in a 9-month-old boy in Zaire (now the Democratic Republic of the  
37 Congo) in 1970.<sup>4-6</sup> Animal-to-human transmission of MPXV can occur via humans'  
38 close contact with infected animals while human-to-human transmission includes  
39 contact with bodily fluids, respiratory droplets, and lesion materials of the infected  
40 individual, sexual transmission, and maternal-infant transmission.<sup>7, 8</sup> Since the first  
41 human case, monkeypox has become predominantly endemic in Central and West  
42 Africa, for example, Nigeria experienced a large monkeypox outbreak in 2017, with  
43 relevant cases continuously emerging.<sup>9-11</sup> It was not until 2003 that the first case  
44 occurred in the United States, mainly due to the importation of infected pet prairie  
45 dogs from Ghana. Since 2018, monkeypox has also been reported in tourists from  
46 Nigeria to other non-endemic countries, involving Israel,<sup>12</sup> the United Kingdom,<sup>13, 14</sup>  
47 Singapore,<sup>15</sup> the United States of America,<sup>16, 17</sup> and others.<sup>18</sup> Disturbingly, the World  
48 Health Organization (WHO) has collected a total of 71,237 laboratory-confirmed  
49 cases and 1,097 probable cases from 107 infected member countries since 1 January  
50 2022, and declared this outbreak a public health emergency of international concern.<sup>19</sup>  
51 It has become a new reality that human monkeypox is no longer a rare zoonotic  
52 disease, which deserves more public health attention.<sup>20</sup> Thus, the detection of  
53 monkeypox matters even more in the current post-COVID, more vigilant world.<sup>21</sup>

54           Currently, the MPXV testing relies on methods including polymerase chain  
55 reaction (PCR),<sup>22-24</sup> enzyme-linked immunosorbent assay (ELISA),<sup>25, 26</sup>  
56 loop-mediated isothermal amplification (LAMP),<sup>27</sup> and microarray.<sup>28, 29</sup> PCR,  
57 recognized as the gold standard for the diagnosis of various diseases including  
58 monkeypox, displays high accuracy and sensitivity, yet its application in low-resource  
59 areas is limited due to its requirements for expensive equipment and skilled  
60 operators.<sup>30</sup> ELISA may fail in providing MPXV-specific analysis for the  
61 serologically cross-reactive characteristic of OPXV and lead to false positive results  
62 for recent or remote vaccination.<sup>31</sup> LAMP is free from precise thermo-cycling, but it  
63 suffers from complicated primer design, false positives, and poor quantitative  
64 performance. Besides, the microarray method has been developed for the detection  
65 and discrimination of OPXV species; however, its practicality and accessibility is  
66 limited deriving from high cost and long detection time.<sup>32</sup> Therefore, low-cost,  
67 ultrasensitive, and rapid methods that can facilitate on-site and facile MPXV detection  
68 have remained elusive.

69           CRISPR/Cas (clustered regularly interspaced short palindromic repeats and  
70 CRISPR-associated protein) discovered in the adaptive immune system of  
71 prokaryotes, was initially proposed as a revolutionary gene editing technology and  
72 later expanded to the fields of molecular diagnosis and biosensing.<sup>33, 34</sup>  
73 CRISPR/Cas12a system that integrates biorecognition (Cas12a crRNA binding to the  
74 target) with signal transduction (activated Cas12a indiscriminately cleaving any  
75 surrounding single-stranded DNA reporters) has participated in the detection of

76 various viruses, including severe acute respiratory syndrome coronavirus 2  
77 (SARS-CoV-2),<sup>35</sup> African swine fever virus (ASFV),<sup>36</sup> human immunodeficiency  
78 virus (HIV),<sup>37</sup> displaying obvious advantages of mild conditions, operational  
79 simplicity, great sensitivity, and potent signal amplification.<sup>38, 39</sup> Currently, the  
80 CRISPR/Cas12a-based MPXV assay has not been systematically reported. According  
81 to the best of our knowledge, there is only one short letter discussed the possibility  
82 of implementing CRISPR technology in MPXV detection, while details on  
83 pre-amplification, probe screening, analytical performance, and point-of-care testing  
84 (POCT) have not been included.<sup>40</sup>

85       Herein, we proposed an ultrasensitive and rapid MPXV assay that integrates  
86 recombinase-aided amplification (RAA) with CRISPR/Cas12a (the  
87 RAA-Cas12a-MPXV assay) for the first time. After RAA pre-amplification of DNA  
88 templates (containing MPXV *F3L* gene), CRISPR/Cas12a-based amplicon  
89 recognition, and rapid cleavage of reporters, ultrasensitive detection of MPXV down  
90 to 10<sup>1</sup> copies/μL via fluorescence readout was accomplished, which is 1000-fold more  
91 sensitive than PCR. For MPXV POCT, we chose lateral flow strip technology as the  
92 reliable interpretation of the assay and achieved the detection limit of 10<sup>4</sup> copies/μL.  
93 Our RAA-Cas12a-MPXV assay has the potential to detect MPXV with excellent  
94 sensitivity, and selectivity with the aid of basic heaters, providing a rapid, convenient,  
95 visual method for on-site screening in low-resource regions.

96

## 97 **Results and Discussion**

### 98 **Principle and verification of RAA-Cas12a-MPXV Assay**

99 The principle of our RAA-Cas12a-MPXV assay is illustrated in Scheme 1. It  
100 consists of three steps: RAA amplification, CRISPR/Cas12a cleavage, and signal  
101 output. In the first step, RAA selecting the DNA template, the conserved region of  
102 MPXV-specific *F3L* gene,<sup>41-43</sup> as the target sequence, produces numerous amplicons  
103 enhanced the sensitivity of the assay. In the second step, crRNA-specific recognition  
104 and binding of amplicons activate the *trans*-cleavage activity of Cas12a, resulting in a  
105 large number of ssDNA reporters cleaved. Depending on different reporters, the third  
106 step presents two modes of signal output, fluorescence assay for FQ reporters  
107 (modified with 6-FAM at the 5' end and BHQ1 at the 3' end) and lateral flow strip  
108 assay for FB reporters (modified with 6-FAM at the 5' end and biotin at the 3' end),  
109 improving the suitability and usability of our RAA-Cas12a-MPXV assay. The  
110 departure of fluorophores of FQ reporters from quenchers enables fluorescence assay  
111 using a fluorescence reader. In lateral flow strip assay, biotin of FB reporters is  
112 captured by streptavidin at the first line on the strip (control), while the  
113 FAM/anti-FAM antibody/AuNP complex migrates toward the second line (test) and  
114 bind to anti-FAM. The result is visible within 5 min after sample addition at room  
115 temperature, and the appearance of red color at the test band is considered positive.

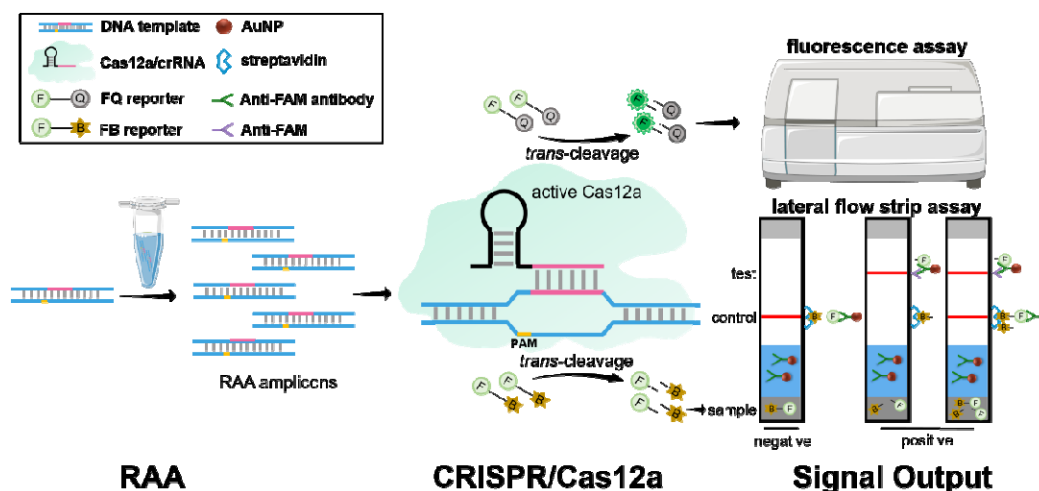

116

117 **Scheme 1.** The principle of RAA-Cas12a-MPXV assay proposed in this research.

118 RAA for DNA template amplification; CRISPR/Cas12a system for reporter cleavage;

119 fluorescence assay and lateral flow strip assay for detection signal output.

120 To assess the feasibility of our RAA-Cas12a-MPXV assay, we compared

121 fluorescence results with or without DNA templates, and RAA product. As shown in

122 Figure 1A, the control group without DNA templates brought no significant

123 fluorescence change (NTC, blue line), indicating that no RAA amplicon was

124 generated for recognition by subsequent CRISPR/Cas12a in the absence of DNA

125 templates. The blank control without RAA product also showed no fluorescent signal,

126 demonstrating that CRISPR/Cas12a system does not cleave reporters without

127 amplicons (NRP, black line). Accordingly, we excluded the possibility of false

128 positive results due to contamination and non-specific amplification during RAA, as

129 well as non-specific cleavage of reporters during CRISPR/Cas12a. In contrast, in the

130 presence of DNA templates, RAA replicated numerous amplicons for crRNA

131 recognition and Cas12a activation, resulting in an intense fluorescence signal (red

132 line). The results obtained by the fluorescence reader were consistent with the  
133 fluorescence spectroscopy (Figure 1B). Moreover, the fluorescence signal could be  
134 observed by the naked eyes under ultraviolet (UV) light (Figure 1B, inset).

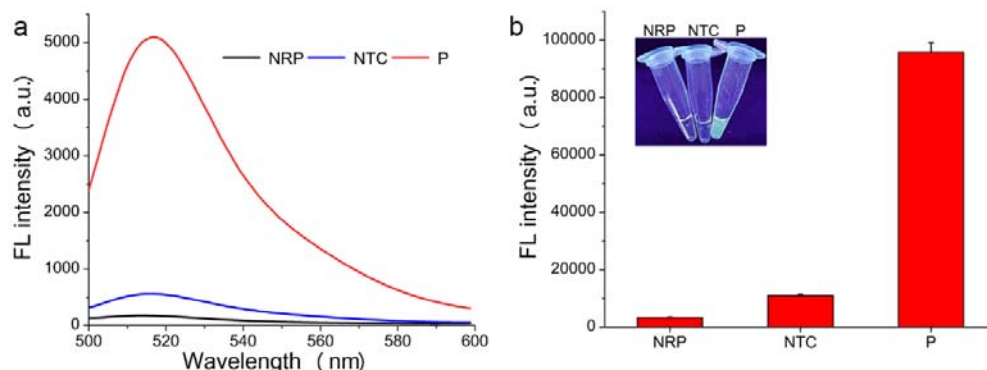

135  
136 **Figure 1.** Verification of RAA-Cas12a-MPXV testing strategy. (a) Fluorescence  
137 spectra of feasibility verification. (b) Fluorescence intensity of feasibility verification.  
138 The inset was photographed by a smartphone under UV light. RAA was carried out  
139 under 42 °C for 30 min using F2 and R2, then 1  $\mu$ L RAA product was added to 20  $\mu$ L  
140 CRISPR/Cas12a reaction (50 nM Cas12a, 50 nM CrRNA, 1  $\mu$ M FQ reporter, 1  $\times$  Cas  
141 Buffer). NRP, no RAA product; NTC, no template control; P, positive.

## 142 Design and screening of RAA primers and Cas12a crRNA

143 RAA primers are the main factors affecting RAA amplification efficiency. To  
144 obtain higher sensitivity and selectivity, three pairs of primers binding at different  
145 sites of the MPXV-specific *F3L* gene were designed (Figure 2a, Table S1). Agarose  
146 gel electrophoresis (AGE) and the RAA-Cas12a-MPXV fluorescence assay were  
147 performed to screen the optimal primers for further experiments. The result of AGE  
148 suggested that amongst the three pairs of RAA primers, only the third pair (F2+R2)



149 achieved the brightest specific amplification band while having no non-specific  
 150 amplification band (Figure 2b). The fluorescence assay further confirmed F2 and R2  
 151 as the most efficient primers, with the lowest fluorescence in NTC and the highest  
 152 fluorescence in P (Figure 2c).

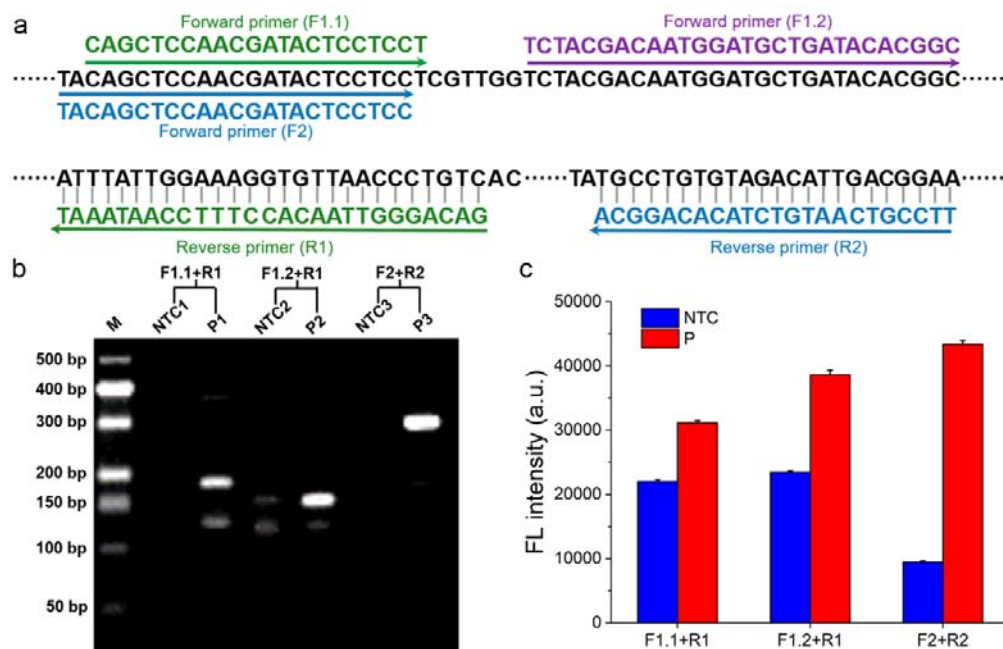

153  
 154 **Figure 2.** Screening optimal primers for RAA. (a) The binding sites of designed  
 155 primers on the DNA template. (b) AGE of RAA product. M, DNA marker; lane NTC1  
 156 and P1, RAA products using F1.1 and R1; lane NTC2 and P2, RAA products using  
 157 F1.2 and R1; lane NTC3 and P3, RAA products using F2 and R2. (c) Fluorescence  
 158 intensity of RAA-CRISPR/Cas12a assay. NTC, no template control; P, positive.

159 Cas12a crRNA plays a central role in amplicon recognition and Cas12a  
 160 activation, thus, to obtain the optimized crRNA that can potently activate Cas12a, we  
 161 designed three crRNAs with the same length, while targeting to different sites on the  
 162 RAA amplicon (Figure 3a). All of the crRNAs we designed activated Cas12a which

163 subsequently cis-cleaved amplicons (no bands in the insert of Figure 3b) and  
 164 trans-cleaved FQ reporters (rising fluorescence in Figure 3b), while crRNA2 was the  
 165 best candidate for its highest fluorescence intensity. With crRNA2-activating  
 166 CRISPR/Cas12a, we observed a considerable fluorescence difference between the  
 167 negative group and the positive group (Figure 3c). Consequently, we selected crRNA2  
 168 for the following study.

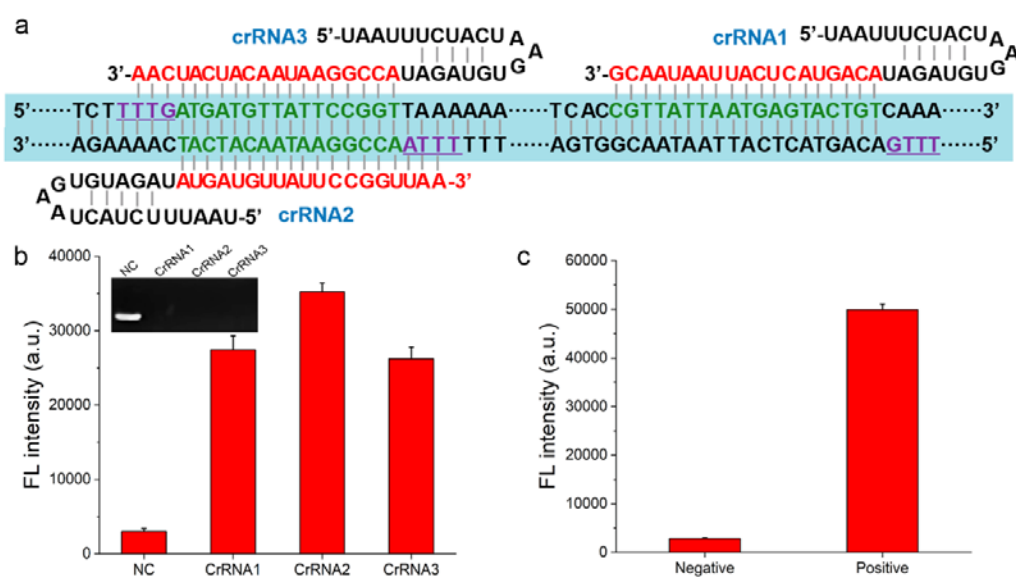

169  
 170 **Figure 3.** Screening an optimal crRNA for CRISPR/Cas12a. (a) The binding sites of  
 171 designed crRNAs on the DNA template (Green, crRNA binding sites; purple, PAM  
 172 motifs). (b) Fluorescence intensity of CRISPR/Cas12a assay using different crRNAs.  
 173 NC, no crRNA. The inset was an agarose gel image corresponding to different groups.  
 174 Lane NC, CRISPR/Cas12a reaction products with no crRNA; lane crRNA1,  
 175 CRISPR/Cas12a reaction products using crRNA1; lane crRNA2, CRISPR/Cas12a  
 176 reaction products using crRNA2; lane crRNA3, CRISPR/Cas12a reaction products  
 177 using crRNA3. (c) Fluorescence intensity of CRISPR/Cas12a assay using the

178 optimum crRNA2. Negative, without templates; positive, with templates.

### 179 **Optimization of the assay conditions**

180 To obtain optimal analytical performance of our RAA-Cas12a-MPXV assay,  
181 several critical experimental conditions during RAA amplification and the  
182 CRISPR/Cas12a system were optimized. We first optimized the temperature and  
183 reaction time of RAA based on the optimal primers (F2 and R2). The band of 30-min  
184 RAA was significantly brighter than that of other amplification times (Figure 4a), and  
185 the fluorescence result reconfirmed 30 min as the ideal RAA reaction time (Figure S1).  
186 Likewise, we chose 42 °C as the optimal temperature for RAA by combining the  
187 results of electrophoresis and fluorescence assay (Figure 4b, Figure S1).

188 After the determination of RAA amplification conditions (42 °C, 30 min), we  
189 further optimized the CRISPR/Cas12a system with crRNA2. We first investigated the  
190 cleavage ability of Cas12a at different reaction times. The fluorescence intensity  
191 spiked rapidly from the onset of the reaction to 40 min, and the cleavage efficiency  
192 reached its maximum at 40 min, after which the fluorescence slowly increased (Figure  
193 4c), thus, we chose 40 min as the best CRISPR reaction time. Furthermore, we  
194 explored the effects of Cas12a:crRNA on the ultimate fluorescence intensity and  
195 found that 1:1 was the optimal ratio (Figure 4d).

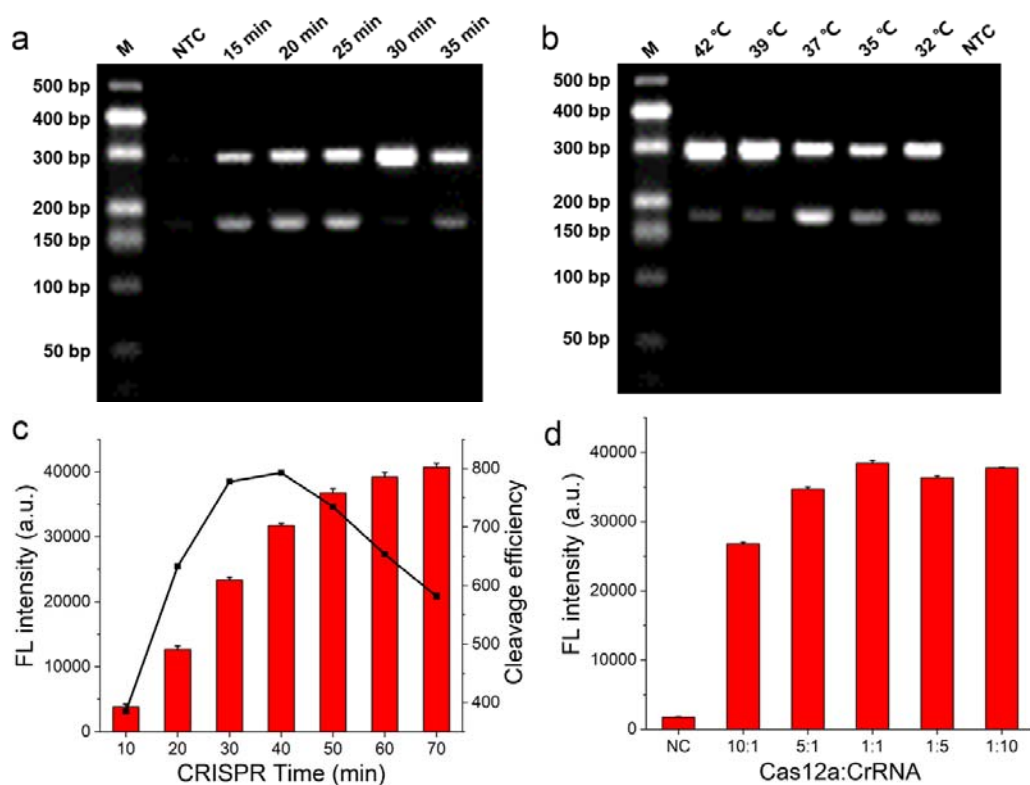

196

197 **Figure 4.** Optimization of the assay conditions. (a) The agarose gel image of RAA  
198 amplification products under different reaction times (15 min, 20 min, 25 min, 30 min,  
199 35 min). (b) The agarose gel image of RAA amplification products under different  
200 temperatures (42 °C, 39 °C, 37 °C, 35 °C, 32 °C). NTC, no template control. (c)  
201 Fluorescence intensity of CRISPR/Cas12a assay under different reaction times (10  
202 min, 20 min, 30 min, 40 min, 50 min, 60 min, 70 min). Cleavage efficiency =  
203 fluorescence intensity/CRISPR time. (d) Fluorescence intensity of CRISPR/Cas12a  
204 assay using different ratios of Cas12a and crRNA (10:1, 5:1, 1:1, 1:5, 1:10). NC, no  
205 crRNA.

#### 206 **Performances of the proposed RAA-Cas12a-MPXV fluorescence assay**

207 As shown in Figure 5a, our proposed RAA-Cas12a-MPXV fluorescence assay  
208 has the merits of easy operation and rapid testing. To evaluate the sensitivity of the

209 fluorescence assay, DNA templates at serial dilution concentrations in the range of  $10^0$   
210 to  $10^{10}$  copies/ $\mu\text{L}$  were subjected to RAA amplification, and then a 1  $\mu\text{L}$  amplification  
211 product was taken for the CRISPR/Cas12a reaction. The resulting fluorescence  
212 intensity in Figure 5a exhibited that compared to the control group without the DNA  
213 template and RAA product, the difference initiated in the group of  $10^1$  copies/ $\mu\text{L}$ , and  
214 gradually widened in the following groups, hence the limit of detection (LOD) of the  
215 RAA-Cas12a-MPXV fluorescence assay was  $10^1$  copies/ $\mu\text{L}$ . Additionally, we  
216 achieved the LOD of  $10^2$  copies/ $\mu\text{L}$  via naked-eye observation under UV light (Figure  
217 5b, insert). We also evaluated the sensitivity of the PCR-Cas12a-MPXV fluorescence  
218 assay (detailed in Supporting Information). In comparison with the  
219 PCR-Cas12a-MPXV fluorescence assay, the LOD of which was  $10^4$  copies/ $\mu\text{L}$  (Figure  
220 S2), the RAA-Cas12a-MPXV fluorescence assay we established achieved 1000-fold  
221 lower LOD, performing outstanding sensitivity. The higher sensitivity of RAA-based  
222 assay is ascribed to the higher amplification efficiency of RAA and the better  
223 compatibility of RAA to CRISPR.<sup>44-46</sup>

224 The selectivity of our RAA-Cas12a-MPXV fluorescence assay was next assessed  
225 by comparing the fluorescence intensity produced by MPXV with that produced by  
226 other viruses: cowpox virus (CPXV), variola virus (VARV), ASFV, and *Toxoplasma*  
227 *Gondii* virus (TOXV), SARS-CoV-2. Both fluorescence values and naked-eye  
228 observation demonstrated that only the MPXV group induced enhanced fluorescence  
229 while other orthopox viruses (CPXV and VARV), and current high-profile viruses  
230 (ASFV, TOXV, SARS-CoV-2) showed no fluorescence changes (Figure 5c). These

231 results confirmed the superior selectivity of our strategy toward MPXV, which is  
 232 derived from the outstanding specificity of RAA amplification and Cas12a  
 233 recognition.<sup>47-49</sup>

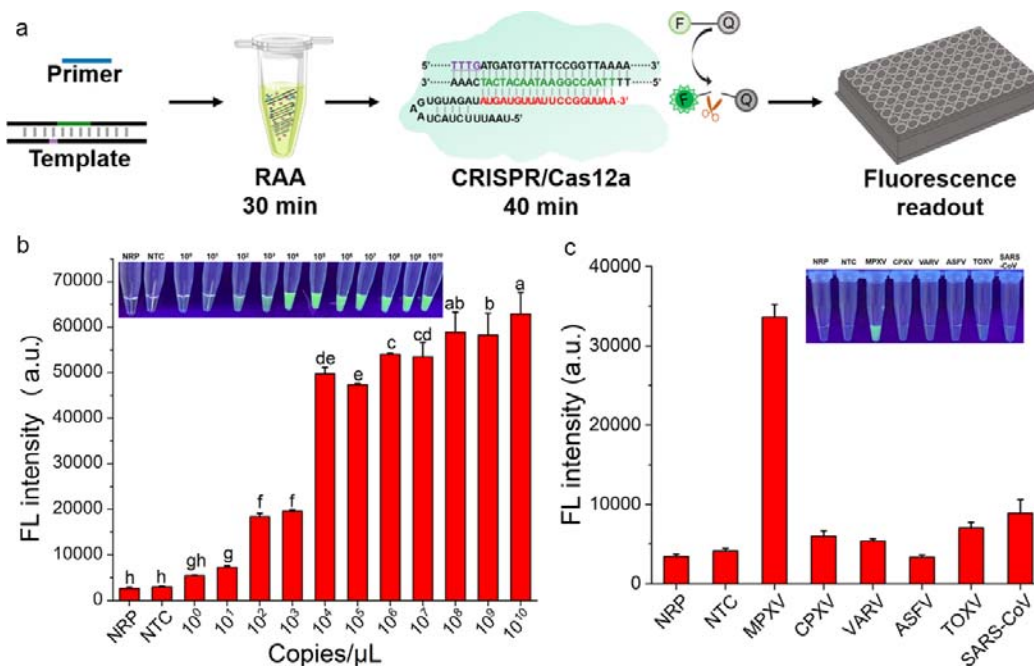

234  
 235 **Figure 5.** Performances of the RAA-Cas12a-MPXV fluorescence assay. (a) Flowchart  
 236 of the fluorescence assay. (b) Fluorescence intensity responding to a serial 10-fold  
 237 dilution ( $10^{10-0}$  copies/ $\mu\text{L}$ ) of DNA templates in the sensitivity evaluation. The inset  
 238 was photographed by a smartphone under UV light. Copy numbers and serial dilution  
 239 values that are significantly different from each other are labeled with different  
 240 lowercase letters above the error bars ( $p < 0.05$ ). (c) Fluorescence intensity  
 241 responding to MPXV, CPXV, VARV, ASFV, TOXV, and SARA-CoV-2 in the  
 242 selectivity evaluation. The inset was photographed by a smartphone under UV light.  
 243 NRP, no RAA product; NTC, no template control.

244 **RAA-Cas12a-MPXV Lateral Flow Strip Assay for Point-of-Care Testing**

245 To enable POCT, we designed the FB reporter as a substitute for the FQ reporter  
246 of the fluorescence assay and established the RAA-Cas12a-MPXV lateral flow strip  
247 assay (Figure 6a). Upon the addition of the reaction solution containing both intact FB  
248 reporters and cracked FAMs and biotins at the sample pad, the anti-FAM  
249 antibody/AuNP complexes quickly bound to the isolated FAMs as well as the intact  
250 FB reporters as the sample migrated forward. Subsequently, the streptavidin, which  
251 was immobilized at the control band, captured the cracked biotins and the FB  
252 reporter/anti-FAM antibody/AuNP complexes, so that the control band appeared red  
253 owing to the aggregation of AuNPs. The rest isolated FAM/anti-FAM antibody/AuNP  
254 complexes migrated toward the test band and were captured by the FAM antibodies,  
255 appearing red. Once there were enough amplicons to activate Cas12a to cleave all FB  
256 reporters at maximum capacity, the color change would only appear at the test band as  
257 a result. In brief, the color change appearing at the test band only or both the control  
258 band and the test band indicated a positive result. In the negative group, the absence  
259 of the DNA templates led to no amplicons for Cas12a activation and reporters  
260 cleavage, consequently, the red color appeared only at the control band.

261 In the sensitivity assessment, with the increasing number of DNA templates,  
262 amplicons for crRNA recognition and Cas12a activation incrementally grew via RAA,  
263 eventually leading to a growing number of FB reporters being cleaved into FAM and  
264 biotin, allowing the result that the color became darker at the test band and became  
265 lighter at the control band presented on the lateral flow strips. Through naked-eye  
266 observation, our RAA-Cas12a-MPXV lateral flow strip assay achieved the LOD of



267  $10^4$  copies/ $\mu\text{L}$  (Figure 6b). Besides, this lateral flow strip assay showed great  
268 selectivity, as demonstrated by the cross-reactivity test with other orthopox viruses  
269 and current high-profile viruses (Figure 6c).

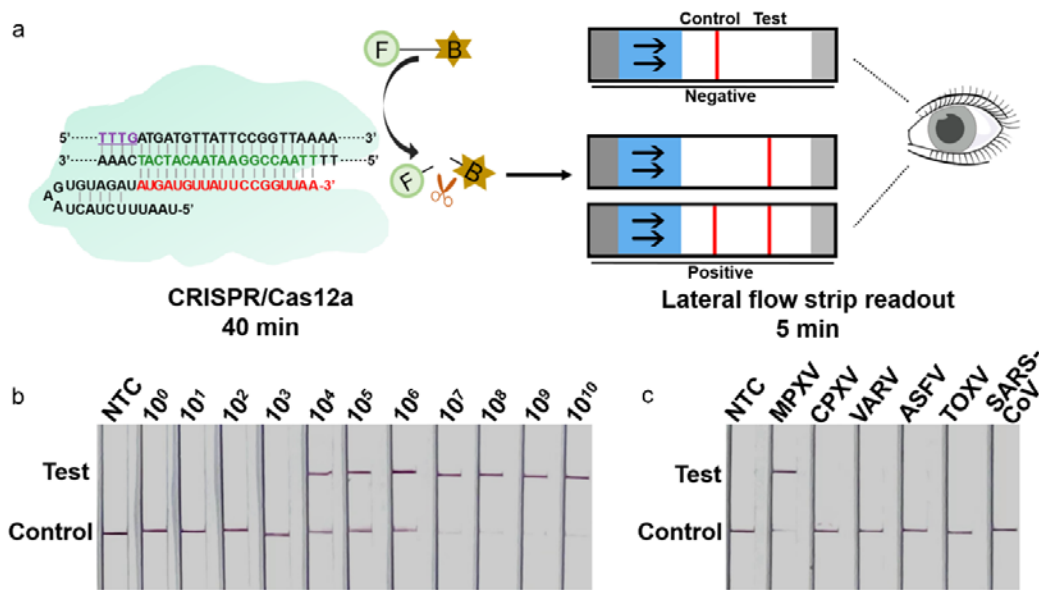

270

271 **Figure 6.** Performances of the RAA-Cas12a-MPXV lateral flow strip assay. (a)  
272 Flowchart of the lateral flow strip assay. (b) Lateral flow strip results responding to a  
273 serial 10-fold dilution ( $10^{10-0}$  copies/ $\mu\text{L}$ ) of DNA templates in the sensitivity  
274 evaluation. (c) Lateral flow strip results responding to MPXV, CPXV, VARV, ASFV,  
275 TOXV, and SARA-CoV-2 in the selectivity evaluation. NTC, no template control.

276



## 277 **Conclusions**

278 In this work, we established an RAA-Cas12a-MPXV assay for ultrasensitive,  
279 facile, and rapid detection of MPXV by integrating RAA amplification with  
280 CRISPR/Cas12a system and outputting the detection signal in the form of  
281 fluorescence or lateral flow strip. Compared to current methods reported for detecting  
282 MPXV, our RAA-Cas12a-MPXV assay possessed its notable strengths: (1) our assay  
283 was carried out at a gentle temperature throughout, getting rid of the restraints of  
284 thermal cycling processes and expensive instruments; (2) compared to the  
285 conventional PCR with the LOD of  $10^4$  copies/ $\mu\text{L}$ , our assay exhibited a significantly  
286 improved detection limit of  $10^1$  copies/ $\mu\text{L}$  in the fluorescence assay, 1000-fold more  
287 sensitive than PCR. Meanwhile, visualized detection was realized with the LOD of  
288  $10^2$  copies/ $\mu\text{L}$  via UV light, and  $10^4$  copies/ $\mu\text{L}$  via lateral flow strip; (3) combining the  
289 lateral flow strip enabled us to perform on-site detection via naked eyes within 5 min  
290 at room temperature with no need for any lab equipment, revealing the POCT  
291 potential for screening MPXV in low-equipment scenario. Overall, the  
292 RAA-Cas12a-MPXV assay is a promising method for MPXV detection with  
293 outstanding sensitivity, selectivity, and portability.

294

## 295 **Experimental section**

### 296 **Materials and Reagents**

297 The oligonucleotides used in this study were synthesized and purified by Sangon  
298 Biotech (Shanghai, China) and listed in Table S1. The monkeypox virus *F3L* plasmid  
299 was purchased from Sangon Biotech. The RAA nucleic acid amplification kit  
300 (S001ZC) was purchased from ZC Bioscience (Hangzhou, China). The 2 × Taq  
301 Master Mix (P111) for PCR and the fastpure gel DNA extraction mini kit (DC301)  
302 were provided from Vazyme Biotech (Nanjing, China). The Cas12a nuclease was  
303 expressed and purified by our laboratory, details were provided in the supporting  
304 information. Reagents in the 10 × Cas Buffer (500 mM NaCl, 100 mM Tris-HCl, 100  
305 mM MgCl<sub>2</sub>, 1 mg/mL BSA, pH 7.9) were purchased from Aladdin (Shanghai, China).  
306 The lateral flow strip was purchased from IVD Biotech Service Center (Shanghai,  
307 China).

### 308 **Primers and crRNAs Design**

309 The MPXV *F3L* gene sequence in this study was derived from German strain  
310 MPXV-BY-IMB25241 (GenBank: ON568298) in May 2022 and American strain  
311 MPXV-USA-2022-MA001 (GenBank: ON563414) during the same period, the  
312 difference of which from Zaire strain Zaire-96-I-16 (NCBI Gene ID: 928998) was a  
313 partial site mutation. Referring to the previously reported PCR primers for Zaire  
314 strains with some changes,<sup>50</sup> we designed three pairs of RAA primers and screened  
315 out the best primers in the follow-up. Cas12a crRNA consisted of a repeat sequence  
316 and a amplicon -specific sequence. We designed three 19-nt crRNAs without the PAM

317 motif (TTTN), while the PAM motif appeared at the 5' end of the non-complementary  
318 DNA sequence being targeted.

### 319 **Plasmid Construction and Amplification**

320 The gene sequences of CPXV, VARV, ASFV, and *Toxoplasma Gondii* virus  
321 (TOXV) were retrieved from GenBank under accession number X75158, AY552594,  
322 MN809121 and AF146527, then cloned into PUC57 vectors (Sangon, China) to create  
323 the recombinant plasmids. After transformation into *E. coli* DH5 $\alpha$  and expansion  
324 overnight, the recombinant plasmids were extracted using AxyPrep plasmid DNA  
325 mini kit (AP-MN-P-50) purchased from Axygen Biotech (Hangzhou, China). The  
326 concentrations of extracted plasmids were determined with NanoDrop 2000 (Thermo  
327 Fisher, United States).

### 328 **Recombinase-Aided Amplification Reaction**

329 RAA reaction was performed with the RAA nucleic acid amplification kit,  
330 following the manufacturer's instructions. Explicitly, the reaction powder was  
331 dissolved with a mixture containing 5  $\mu$ L A Buffer (provided in the kit), 0.4  $\mu$ L each  
332 of 10  $\mu$ M forward primer and reverse primer, and 2.7  $\mu$ L ddH<sub>2</sub>O. Then, 1 $\mu$ L DNA  
333 template and 0.5 $\mu$ L B Buffer (provided in the kit) were added into the reaction tube  
334 and mixed gently, followed by incubation at 42 °C for 30 min. The DNA template was  
335 replaced by ddH<sub>2</sub>O in no template control (NTC) reaction. RAA products were  
336 verified by 3 % AGE after purification by the fastpure gel DNA extraction mini kit.  
337 The optimum primers for RAA were screened under the observation of the brightness  
338 of the specific bands and the absence of non-specific bands after electrophoresis.

### 339 **RAA-Cas12a-MPXV Fluorescence Assay**

340 The RAA-Cas12a-MPXV fluorescence assay was performed in a 20  $\mu$ L system  
341 containing 1  $\times$  Cas Buffer, 50 nM crRNA, 50 nM Cas12a, 1  $\mu$ M FQ reporter, and 1  $\mu$ L  
342 RAA product. Cas12a and crRNA were pre-conjugated in Cas Buffer at 37  $^{\circ}$ C for 10  
343 min to facilitate cleavage performance of Cas12a. After the addition of FQ and RAA  
344 product, the CRISPR reaction was incubated at 37  $^{\circ}$ C for 40 min and observed under  
345 the FAM channel of the BioTek Synergy H1M microplate reader (Bio-Tek, United  
346 States). In no RAA product (NRP) reaction, ddH<sub>2</sub>O was in place of the RAA product.

### 347 **RAA-Cas12a-MPXV Lateral Flow Strip Assay**

348 The reaction system of the RAA-Cas12a-MPXV lateral flow strip assay was  
349 similar to the fluorescence assay above, except for the replacement of the FQ with the  
350 FB reporter. After incubation at 37  $^{\circ}$ C for 40 min, sterile ddH<sub>2</sub>O was added to make  
351 up the reaction system to 50  $\mu$ L for the insertion of the lateral flow strip. The result  
352 was visualized after 5 min incubation at room temperature. The color appeared only at  
353 the control band, indicating a negative result, and the color appeared at the test band  
354 or both bands, indicating a positive result.

### 355 **Statistical Analysis**

356 Software OriginPro 2021 (OriginLab, Northampton, MA) was used for statistical  
357 analyses and graphs. Data were shown as the average  $\pm$  standard deviation (n = 3).  
358 Error bars represent the standard deviation from three independent experiments.

359

360 **Acknowledgments**

361       This work was supported by grants from the Natural Science Foundation of  
362       Jiangsu Province (No. BK20200718 to B.Li), the Natural Science Foundation of the  
363       Jiangsu Higher Education Institutions of China (20KJB350010 to B.Li), Jiangsu  
364       Innovation and Entrepreneurship Doctoral Program to X.Zhang, and Jiangsu  
365       Specially-Appointed Professor Project to X.Zhang.

366 **Conflict of Interest Disclosure**

367       The authors declare no competing financial interest.

368

369 **References**

- 370 (1) Xiang, Y.; White, A. Monkeypox virus emerges from the shadow of its more  
371 infamous cousin: family biology matters. *Emerg Microbes Infec* **2022**, *11* (1),  
372 1768-1777.
- 373 (2) Bunge, E. M.; Hoet, B.; Chen, L.; Lienert, F.; Weidenthaler, H.; Baer, L. R.;  
374 Steffen, R. The changing epidemiology of human monkeypox-A potential threat? A  
375 systematic review. *PLoS Negl Trop Dis* **2022**, *16* (2), e0010141.
- 376 (3) Organization, W. H. *Monkeypox*. 2022.  
377 <https://www.who.int/news-room/fact-sheets/detail/monkeypox>.
- 378 (4) Lai, C. C.; Hsu, C. K.; Yen, M. Y.; Lee, P. I.; Ko, W. C.; Hsueh, P. R. Monkeypox:  
379 An emerging global threat during the COVID-19 pandemic. *J Microbiol Immunol*  
380 *Infect* **2022**. DOI: 10.1016/j.jmii.2022.07.004.
- 381 (5) McFadden, G. Poxvirus tropism. *Nat Rev Microbiol* **2005**, *3* (3), 201-213.
- 382 (6) Plowright, R. K.; Parrish, C. R.; McCallum, H.; Hudson, P. J.; Ko, A. I.; Graham,  
383 A. L.; Lloyd-Smith, J. O. Pathways to zoonotic spillover. *Nat Rev Microbiol* **2017**, *15*  
384 (8), 502-510.
- 385 (7) Murphy, H.; Ly, H. The potential risks posed by inter- and intraspecies  
386 transmissions of monkeypox virus. *Virulence* **2022**, *13* (1), 1681-1683.
- 387 (8) Di Giulio, D. B.; Eckburg, P. B. Human monkeypox: an emerging zoonosis.  
388 *Lancet Infect Dis* **2004**, *4* (1), 15-25.
- 389 (9) Reed, K. D.; Melski, J. W.; Graham, M. B.; Regnery, R. L.; Sotir, M. J.; Wegner,  
390 M. V.; Kazmierczak, J. J.; Stratman, E. J.; Li, Y.; Fairley, J. A.; et al. The detection of

- 391 monkeypox in humans in the Western Hemisphere. *N Engl J Med* **2004**, *350* (4),  
392 342-350.
- 393 (10) Rimoin, A. W.; Mulembakani, P. M.; Johnston, S. C.; Lloyd Smith, J. O.; Kisalu,  
394 N. K.; Kinkela, T. L.; Blumberg, S.; Thomassen, H. A.; Pike, B. L.; Fair, J. N.; et al.  
395 Major increase in human monkeypox incidence 30 years after smallpox vaccination  
396 campaigns cease in the Democratic Republic of Congo. *Proc Natl Acad Sci U S A*  
397 **2010**, *107* (37), 16262-16267.
- 398 (11) Durski, K. N.; McCollum, A. M.; Nakazawa, Y.; Petersen, B. W.; Reynolds, M.  
399 G.; Briand, S.; Djingarey, M. H.; Olson, V.; Damon, I. K.; Khalakdina, A. Emergence  
400 of Monkeypox - West and Central Africa, 1970-2017. *MMWR Morb Mortal Wkly Rep*  
401 **2018**, *67* (10), 306-310.
- 402 (12) Erez, N.; Achdout, H.; Milrot, E.; Schwartz, Y.; Wiener-Well, Y.; Paran, N.; Politi,  
403 B.; Tamir, H.; Israely, T.; Weiss, S.; et al. Diagnosis of Imported Monkeypox, Israel,  
404 2018. *Emerg Infect Dis* **2019**, *25* (5), 980-983.
- 405 (13) Hobson, G.; Adamson, J.; Adler, H.; Firth, R.; Gould, S.; Houlihan, C.; Johnson,  
406 C.; Porter, D.; Rampling, T.; Ratcliffe, L.; et al. Family cluster of three cases of  
407 monkeypox imported from Nigeria to the United Kingdom, May 2021. *Euro Surveill*  
408 **2021**, *26* (32), 2100745.
- 409 (14) Vaughan, A.; Aarons, E.; Astbury, J.; Balasegaram, S.; Beadsworth, M.; Beck, C.  
410 R.; Chand, M.; O'Connor, C.; Dunning, J.; Ghebrehewet, S.; et al. Two cases of  
411 monkeypox imported to the United Kingdom, September 2018. *Euro Surveill* **2018**,  
412 *23* (38), 2-6.

- 413 (15) Ng, O. T.; Lee, V.; Marimuthu, K.; Vasoo, S.; Chan, G. H.; Lin, R. T. P.; Leo, Y. S.  
414 A case of imported Monkeypox in Singapore. *Lancet Infect Dis* **2019**, *19* (11),  
415 1166-1166.
- 416 (16) Rao, A. K.; Schulte, J.; Chen, T. H.; Hughes, C. M.; Davidson, W.; Neff, J. M.;  
417 Markarian, M.; Delea, K. C.; Wada, S.; Liddell, A.; et al. Monkeypox in a Traveler  
418 Returning from Nigeria - Dallas, Texas, July 2021. *Mmwr-Morbid Mortal W* **2022**, *71*  
419 (14), 509-516.
- 420 (17) Costello, V.; Sowash, M.; Gaur, A.; Cardis, M.; Pasieka, H.; Wortmann, G.;  
421 Ramdeen, S. Imported Monkeypox from International Traveler, Maryland, USA, 2021  
422 (Response). *Emerg Infect Dis* **2022**, *28* (8), 1738-1738.
- 423 (18) Yinka-Ogunleye, A.; Aruna, O.; Dalhat, M.; Ogoina, D.; McCollum, A.; Disu, Y.;  
424 Mamadu, I.; Akinpelu, A.; Ahmad, A.; Burga, J.; et al. Outbreak of human  
425 monkeypox in Nigeria in 2017-18: a clinical and epidemiological report. *Lancet Infect*  
426 *Dis* **2019**, *19* (8), 872-879.
- 427 (19) Organization, W. H. *2022 Monkeypox Outbreak: Global Trends*. 2022.  
428 [https://worldhealthorg.shinyapps.io/mpx\\_global/](https://worldhealthorg.shinyapps.io/mpx_global/).
- 429 (20) Huhn, G. D.; Bauer, A. M.; Yorita, K.; Graham, M. B.; Sejvar, J.; Likos, A.;  
430 Damon, I. K.; Reynolds, M. G.; Kuehnert, M. J. Clinical characteristics of human  
431 monkeypox, and risk factors for severe disease. *Clin Infect Dis* **2005**, *41* (12),  
432 1742-1751.
- 433 (21) Dzobo, M.; Gwinji, P. T.; Murewanhema, G.; Musuka, G.; Dzinamarira, T.  
434 Stigma and public health responses: Lessons learnt from the COVID-19 pandemic to



- 435 inform the recent monkeypox outbreak. *Public Health Pract (Oxf)* **2022**, *4*, 100315.
- 436 (22) Li, Y.; Zhao, H.; Wilkins, K.; Hughes, C.; Damon, I. K. Real-time PCR assays for  
437 the specific detection of monkeypox virus West African and Congo Basin strain DNA.  
438 *J Virol Methods* **2010**, *169* (1), 223-227.
- 439 (23) Chelsky, Z. L.; Dittmann, D.; Blanke, T.; Chang, M.; Vormittag-Nocito, E.;  
440 Jennings, L. J. Validation Study of a Direct Real-Time PCR Protocol for Detection of  
441 Monkeypox Virus. *J Mol Diagn* **2022**. DOI: 10.1016/j.jmoldx.2022.09.001.
- 442 (24) Huggett, J. F.; French, D.; O'Sullivan, D. M.; Moran-Gilad, J.; Zumla, A.  
443 Monkeypox: another test for PCR. *Euro Surveill* **2022**, *27* (32).
- 444 (25) Karem, K. L.; Reynolds, M.; Braden, Z.; Lou, G.; Bernard, N.; Patton, J.; Damon,  
445 I. K. characterization of acute-phase humoral immunity to monkeypox: use of  
446 immunoglobulin M enzyme-linked immunosorbent assay for detection of monkeypox  
447 infection during the 2003 North American outbreak. *Clin Diagn Lab Immunol* **2005**,  
448 *12* (7), 867-872.
- 449 (26) Dubois, M. E.; Hammarlund, E.; Slifka, M. K. Optimization of peptide-based  
450 ELISA for serological diagnostics: a retrospective study of human monkeypox  
451 infection. *Vector Borne Zoonotic Dis* **2012**, *12* (5), 400-409.
- 452 (27) Iizuka, I.; Saijo, M.; Shiota, T.; Ami, Y.; Suzuki, Y.; Nagata, N.; Hasegawa, H.;  
453 Sakai, K.; Fukushi, S.; Mizutani, T.; et al. Loop-mediated isothermal  
454 amplification-based diagnostic assay for monkeypox virus infections. *J Med Virol*  
455 **2009**, *81* (6), 1102-1108.
- 456 (28) Ryabinin, V. A.; Shundrin, L. A.; Kostina, E. B.; Laassri, M.; Chizhikov, V.;

- 457 Shchelkunov, S. N.; Chumakov, K.; Sinyakov, A. N. Microarray assay for detection  
458 and discrimination of Orthopoxvirus species. *J Med Virol* **2006**, *78* (10), 1325-1340.
- 459 (29) Kostina, E. V.; Sinyakov, A. N.; Ryabinin, V. A. A many probes-one spot  
460 hybridization oligonucleotide microarray. *Anal Bioanal Chem* **2018**, *410* (23),  
461 5817-5823.
- 462 (30) Altindis, M.; Puca, E.; Shapo, L. Diagnosis of monkeypox virus - An overview.  
463 *Travel Med Infect Dis* **2022**, *50*, 102459.
- 464 (31) Edghill-Smith, Y.; Golding, H.; Manischewitz, J.; King, L. R.; Scott, D.; Bray, M.;  
465 Nalca, A.; Hooper, J. W.; Whitehouse, C. A.; Schmitz, J. E.; et al. Smallpox  
466 vaccine-induced antibodies are necessary and sufficient for protection against  
467 monkeypox virus. *Nat Med* **2005**, *11* (7), 740-747.
- 468 (32) Berthet, N.; Dickinson, P.; Filliol, I.; Reinhardt, A. K.; Batejat, C.; Vallaey, T.;  
469 Kong, K. A.; Davies, C.; Lee, W.; Zhang, S.; et al. Massively parallel pathogen  
470 identification using high-density microarrays. *Microb Biotechnol* **2008**, *1* (1), 79-86.
- 471 (33) Li, S. Y.; Cheng, Q. X.; Wang, J. M.; Li, X. Y.; Zhang, Z. L.; Gao, S.; Cao, R. B.;  
472 Zhao, G. P.; Wang, J. CRISPR-Cas12a-assisted nucleic acid detection. *Cell Discov*  
473 **2019**, *5* (1), 1.
- 474 (34) Xiong, Y.; Zhang, J.; Yang, Z.; Mou, Q.; Ma, Y.; Xiong, Y.; Lu, Y. Functional  
475 DNA Regulated CRISPR-Cas12a Sensors for Point-of-Care Diagnostics of  
476 Non-Nucleic-Acid Targets. *J Am Chem Soc* **2020**, *142* (1), 207-213.
- 477 (35) Xie, S.; Qin, C.; Zhao, F.; Shang, Z.; Wang, P.; Sohail, M.; Zhang, X.; Li, B. A  
478 DNA-Cu nanocluster and exonuclease I integrated label-free reporting system for

- 479 CRISPR/Cas12a-based SARS-CoV-2 detection with minimized background signals. *J*  
480 *Mater Chem B* **2022**, *10* (32), 6107-6117.
- 481 (36) Xie, S.; Tao, D.; Fu, Y.; Xu, B.; Tang, Y.; Steinaa, L.; Hemmink, J. D.; Pan, W.;  
482 Huang, X.; Nie, X.; et al. Rapid Visual CRISPR Assay: A Naked-Eye Colorimetric  
483 Detection Method for Nucleic Acids Based on CRISPR/Cas12a and a Convolutional  
484 Neural Network. *Acs Synth Biol* **2022**, *11* (1), 383-396.
- 485 (37) Pang, Y.; Li, Q.; Wang, C.; Zhen, S.; Sun, Z.; Xiao, R. CRISPR-cas12a mediated  
486 SERS lateral flow assay for amplification-free detection of double-stranded DNA and  
487 single-base mutation. *Chem Eng J* **2022**, *429*, 132109.
- 488 (38) Chen, J. S.; Ma, E.; Harrington, L. B.; Da Costa, M.; Tian, X.; Palefsky, J. M.;  
489 Doudna, J. A. CRISPR-Cas12a target binding unleashes indiscriminate  
490 single-stranded DNase activity. *Science* **2018**, *360* (6387), 436-439.
- 491 (39) Liang, M.; Li, Z.; Wang, W.; Liu, J.; Liu, L.; Zhu, G.; Karthik, L.; Wang, M.;  
492 Wang, K. F.; Wang, Z.; et al. A CRISPR-Cas12a-derived biosensing platform for the  
493 highly sensitive detection of diverse small molecules. *Nat Commun* **2019**, *10* (1),  
494 3672.
- 495 (40) Sui, Y.; Xu, Q.; Liu, M.; Zuo, K.; Liu, X.; Liu, J. CRISPR-Cas12a-based  
496 detection of monkeypox virus. *J Infect* **2022**. DOI: 10.1016/j.jinf.2022.08.043.
- 497 (41) Kim, J. W.; Lee, M.; Shin, H.; Choi, C. H.; Choi, M. M.; Kim, J. W.; Yi, H.; Yoo,  
498 C. K.; Rhie, G. E. Isolation and identification of monkeypox virus  
499 MPXV-ROK-P1-2022 from the first case in the Republic of Korea. *Osong Public*  
500 *Health Res Perspect* **2022**, *13* (4), 308-311.

- 501 (42) Gong, Q.; Wang, C.; Chuai, X.; Chiu, S. Monkeypox virus: a re-emergent threat  
502 to humans. *Virologica Sinica* **2022**, *37* (4), 477-482.
- 503 (43) Feng, J.; Xue, G.; Cui, X.; Du, B.; Feng, Y.; Cui, J.; Zhao, H.; Gan, L.; Fan, Z.;  
504 Fu, T.; et al. Development of a Loop-Mediated Isothermal Amplification Method for  
505 Rapid and Visual Detection of Monkeypox Virus. *Microbiol Spectr* **2022**, e0271422.
- 506 (44) Zhang, Y.; Li, Q.; Guo, J.; Li, D.; Wang, L.; Wang, X.; Xing, G.; Deng, R.; Zhang,  
507 G. An Isothermal Molecular Point of Care Testing for African Swine Fever Virus  
508 Using Recombinase-Aided Amplification and Lateral Flow Assay Without the Need  
509 to Extract Nucleic Acids in Blood. *Front Cell Infect Microbiol* **2021**, *11*, 633763.
- 510 (45) Ma, Q. N.; Wang, M.; Zheng, L. B.; Lin, Z. Q.; Ehsan, M.; Xiao, X. X.; Zhu, X.  
511 Q. RAA-Cas12a-Tg: A Nucleic Acid Detection System for *Toxoplasma gondii* Based  
512 on CRISPR-Cas12a Combined with Recombinase-Aided Amplification (RAA).  
513 *Microorganisms* **2021**, *9* (8), 1644.
- 514 (46) Zhang, A.; Sun, B.; Zhang, J.; Cheng, C.; Zhou, J.; Niu, F.; Luo, Z.; Yu, L.; Yu,  
515 C.; Dai, Y.; et al. CRISPR/Cas12a Coupled With Recombinase Polymerase  
516 Amplification for Sensitive and Specific Detection of *Aphelenchoides besseyi*. *Front*  
517 *Bioeng Biotechnol* **2022**, *10*, 912959.
- 518 (47) Li, F.; Ye, Q.; Chen, M.; Zhou, B.; Zhang, J.; Pang, R.; Xue, L.; Wang, J.; Zeng,  
519 H.; Wu, S.; et al. An ultrasensitive CRISPR/Cas12a based electrochemical biosensor  
520 for *Listeria monocytogenes* detection. *Biosens Bioelectron* **2021**, *179*, 113073.
- 521 (48) Li, F.; Ye, Q.; Chen, M.; Xiang, X.; Zhang, J.; Pang, R.; Xue, L.; Wang, J.; Gu,  
522 Q.; Lei, T.; et al. Cas12aFDet: A CRISPR/Cas12a-based fluorescence platform for

523 sensitive and specific detection of *Listeria monocytogenes* serotype 4c. *Anal Chim*  
524 *Acta* **2021**, *1151*, 338248.

525 (49) Zhi, S.; Shen, J.; Li, X.; Jiang, Y.; Xue, J.; Fang, T.; Xu, J.; Wang, X.; Cao, Y.;  
526 Yang, D.; et al. Development of Recombinase-Aided Amplification (RAA)-Exo-Probe  
527 and RAA-CRISPR/Cas12a Assays for Rapid Detection of *Campylobacter jejuni* in  
528 Food Samples. *J Agric Food Chem* **2022**, *70* (30), 9557-9566.

529 (50) Kulesh, D. A.; Loveless, B. M.; Norwood, D.; Garrison, J.; Whitehouse, C. A.;  
530 Hartmann, C.; Mucker, E.; Miller, D.; Wasieloski, L. P., Jr.; Huggins, J.; et al.  
531 Monkeypox virus detection in rodents using real-time 3'-minor groove binder TaqMan  
532 assays on the Roche LightCycler. *Lab Invest* **2004**, *84* (9), 1200-1208.

533

534 **For TOC only**

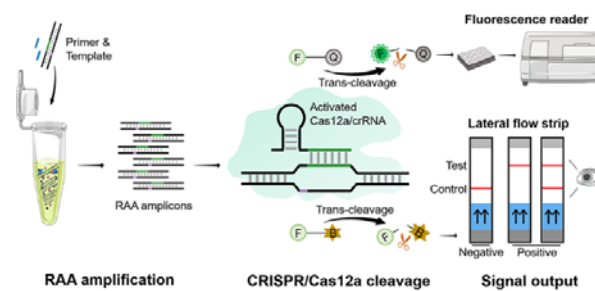

535

536
